# Supplementary material for: Machine Learning to Improve the Sensing of Biomolecules by Conical Track-Etched Nanopore
Source: MDPI journal article supplement (doi:10.3390/bios10100140), 2020-10-05
Supplement: s1 [file s1]

# Supplementary information: Machine learning to improve the sensing of biomolecules by conical track-etched nanopore

Nathan Meyer, Jean-Marc Janot, Mathilde Lepoitevin, Michael Smietana, Jean-Jacques Vasseur, Joan Torrent, Sebastien Balme

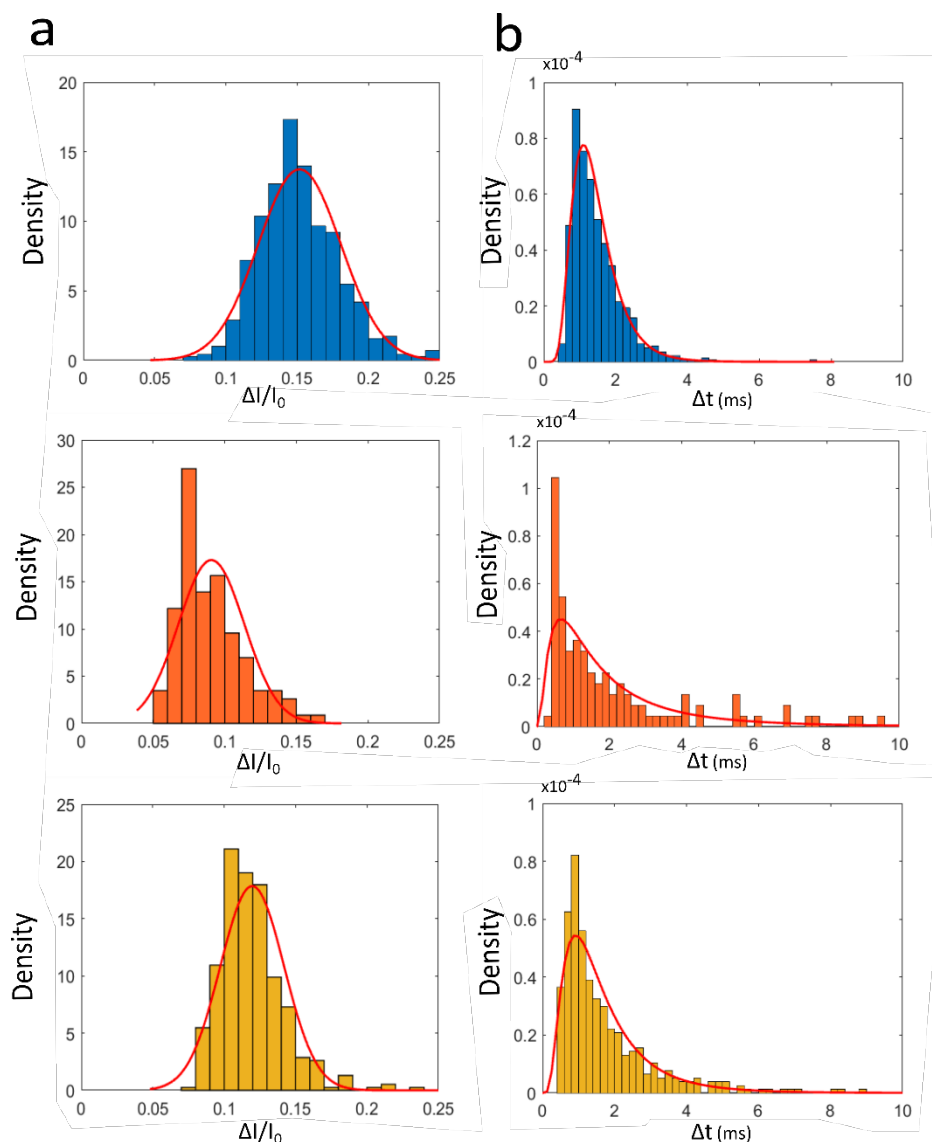

Figure S1 : Distribution histograms of a) the amplitude of the relative current blockade ( $\Delta I/I_0$ ) and b) the dwell time ( $\Delta t$ ) for the  $A_{10}/T_{10}$  (blue),  $A_{40}/T_{40}$  : (orange),  $T_{40}$  (yellow). The events were recorded at 250 mV with the pore 1, the number of events  $n = 703, 116$  and  $388$  for  $A_{10}/T_{10}$ ,  $A_{40}/T_{40}$  and  $T_{40}$  respectively). The results were obtained using the pore 1 ( $d_i = 3$  nm,  $d_b = 200$  nm). The density ( $d_i$ ) is the frequency ( $f_i$ ) of event relative to the sample size ( $n$ ) and the bin width ( $w_i$ )  $d_i = f_i/nw_i$  where  $w_i = 0.01$  and  $200$  for  $\Delta I/I_0$  and  $\Delta t$  respectively.

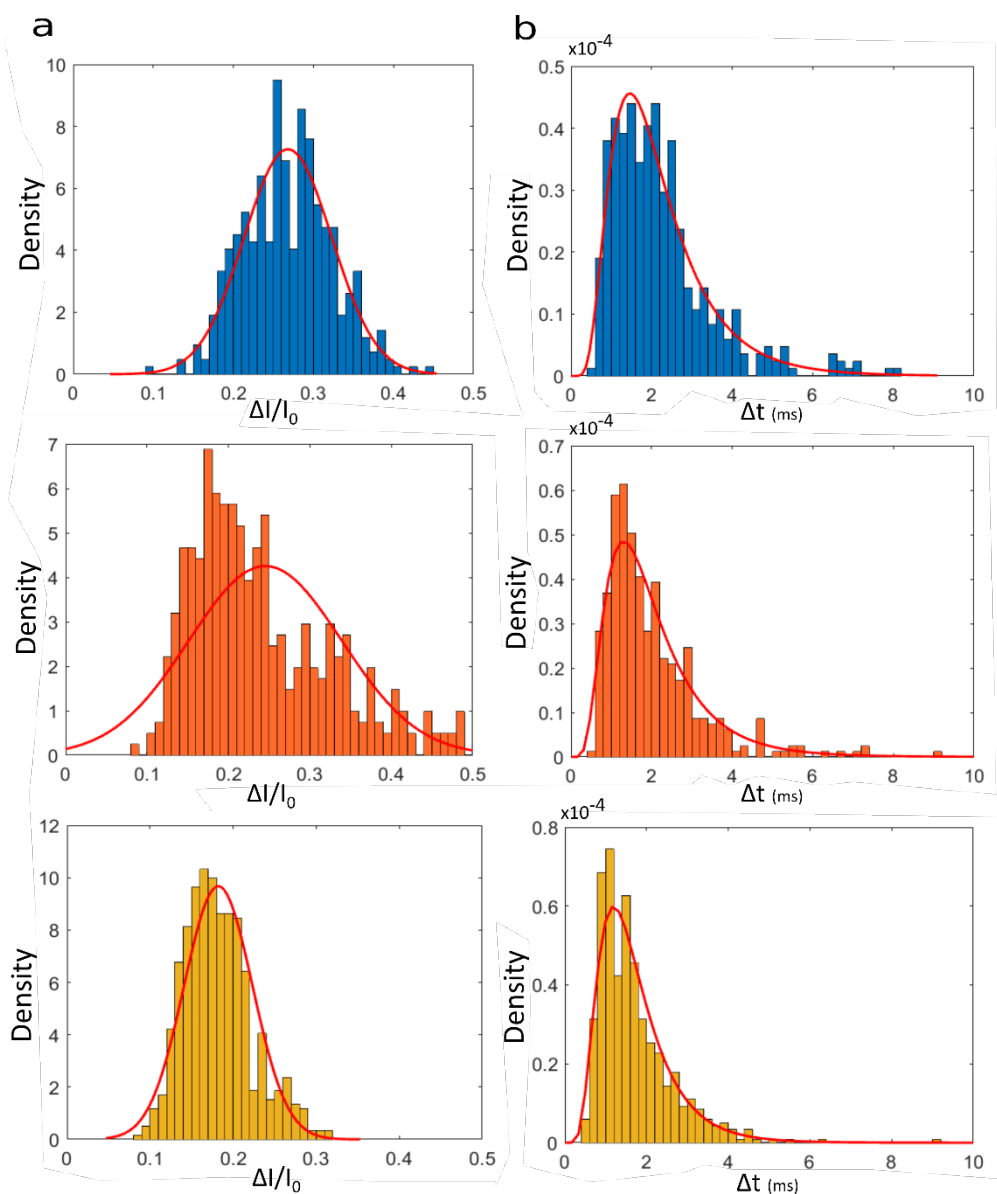

Figure S2: Distribution histograms of a) the amplitude of the relative current blockade ( $\Delta I/I_0$ ) and b) the dwell time ( $\Delta t$ ) for the  $A_{10}/T_{10}$  (blue),  $A_{40}/T_{40}$  (orange),  $T_{40}$  (yellow). The events were recorded at 500 mV with the pore 2, the number of events is 421, 410 and 590 for  $A_{10}/T_{10}$ ,  $A_{40}/T_{40}$  and  $T_{40}$  respectively). The results were obtained using the pore 2 ( $d=4$  nm,  $d_b=350$  nm). The density ( $d_i$ ) is the frequency ( $f_i$ ) of event relative to the sample size ( $n$ ) and the bin width ( $w_i$ )  $d_i = f_i/nw_i$  where  $w_i = 0.01$  and 200 for  $\Delta I/I_0$  and  $\Delta t$  respectively.

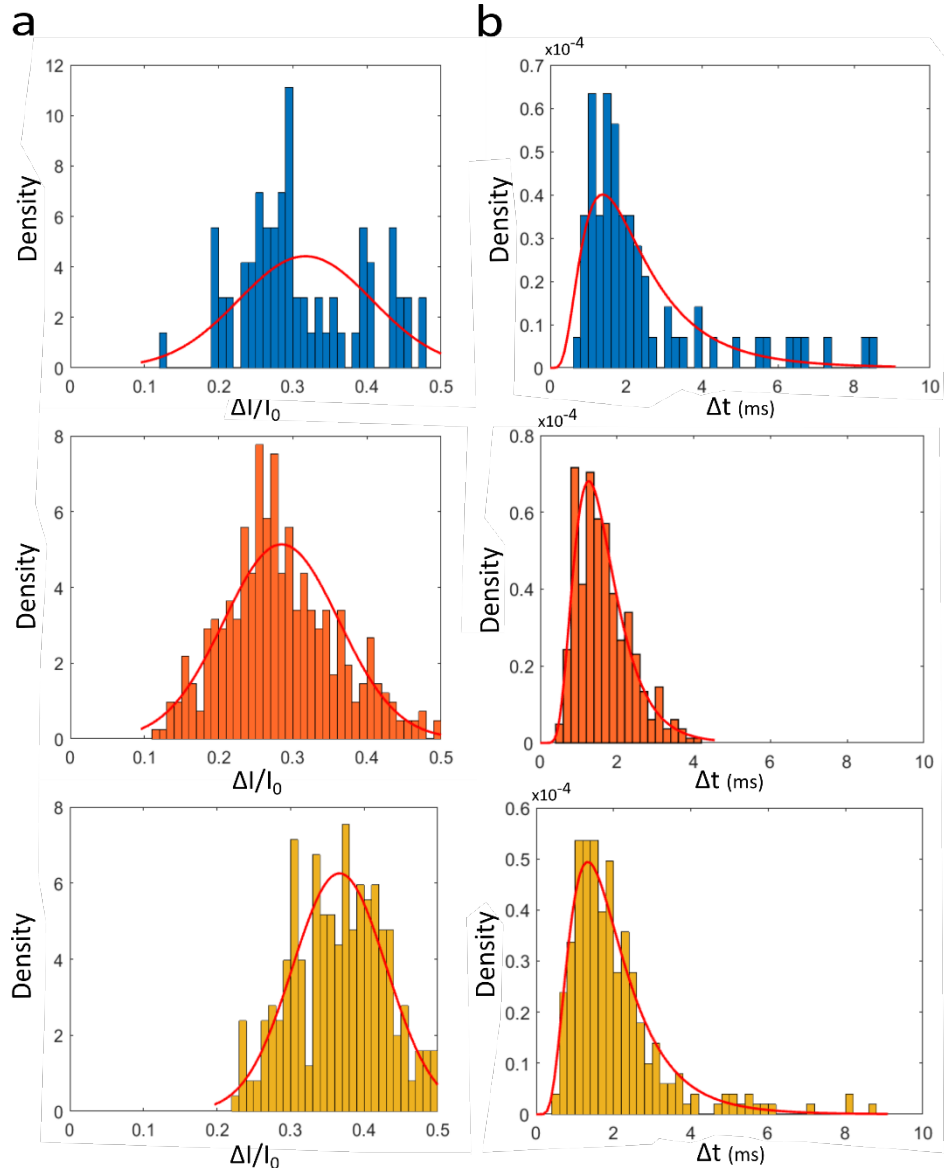

Figure S3 : Distribution histograms of a) the amplitude of the relative current blockade ( $\Delta I/I_0$ ) and b) the dwell time ( $\Delta t$ ) for the  $A_{10}/T_{10}$  (blue),  $A_{40}/T_{40}$  : (orange),  $T_{40}$  (yellow). The events were recorded at 250 mV with the pore 2, the number of events is 80, 415 and 253 for  $A_{10}/T_{10}$ ,  $A_{40}/T_{40}$  and  $T_{40}$  respectively). The results were obtained using the pore 2 ( $d_i=4$  nm,  $d_b=350$  nm). The density ( $d_i$ ) is the frequency ( $f_i$ ) of event relative to the sample size ( $n$ ) and the bin width ( $w_i$ )  $d_i = f_i/nw_i$  where  $w_i = 0.01$  and 200 for  $\Delta I/I_0$  and  $\Delta t$  respectively.

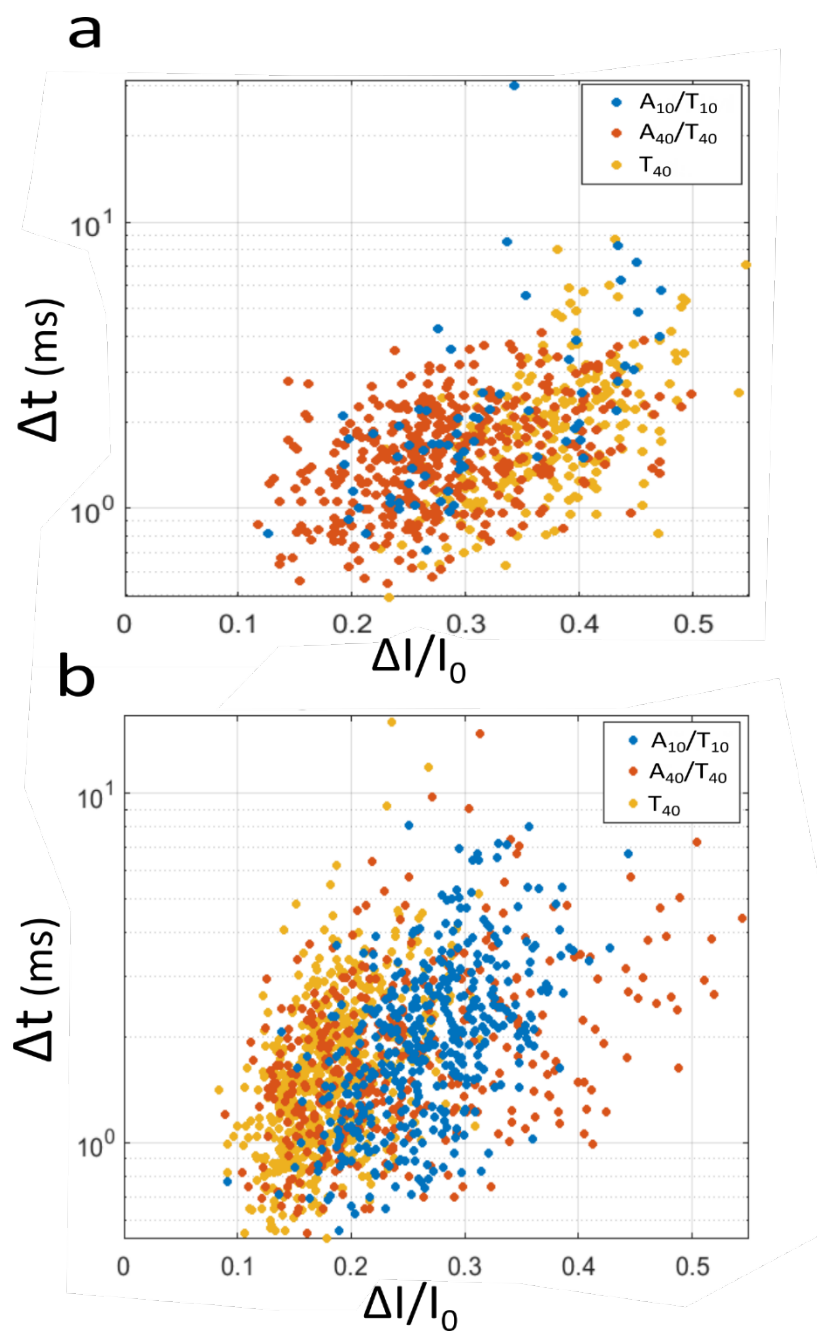

Figure S4 : Scatter plot representing the  $\Delta t$  versus the  $\Delta I/I_0$  for the  $A_{10}/T_{10}$  (blue),  $A_{40}/T_{40}$  (orange),  $T_{40}$  (yellow) for a voltage of (a) 250 mV and (b) 500 mV. The events were recorded with the Pore 1. The number of events recorded at 250 mV  $n=80, 415$  and  $253$  and at 500 mV  $n=421, 410$  and  $590$  for  $A_{10}/T_{10}$ ,  $A_{40}/T_{40}$  and  $T_{40}$  respectively. The results were obtained using the pore 2 ( $d_t=4$  nm,  $d_b=350$  nm)

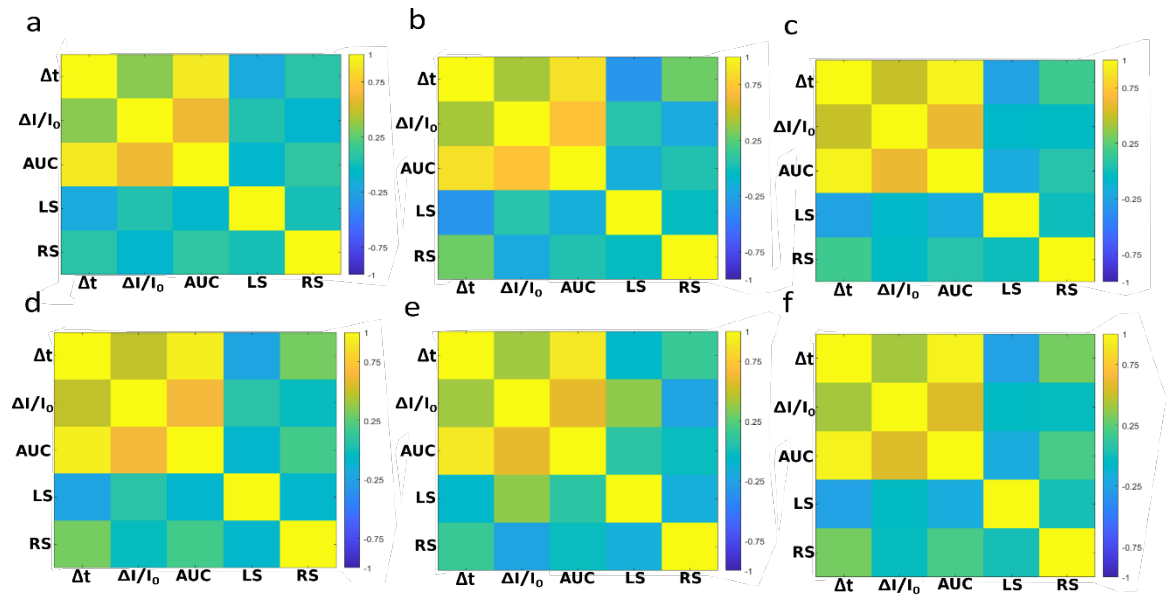

Figure S5 : Heat map representing the correlation between the variables characterizing events obtained under 250 mV for –(b)  $A_{10}/T_{10}$ , (c)  $A_{40}/T_{40}$ , (d)  $T_{40}$  and at 500 mV for (e)  $A_{10}/T_{10}$ , (f)  $A_{40}/T_{40}$ , (g)  $T_{40}$ . The results were obtained using the pore 2 ( $d_t=4$  nm,  $d_b=350$  nm)

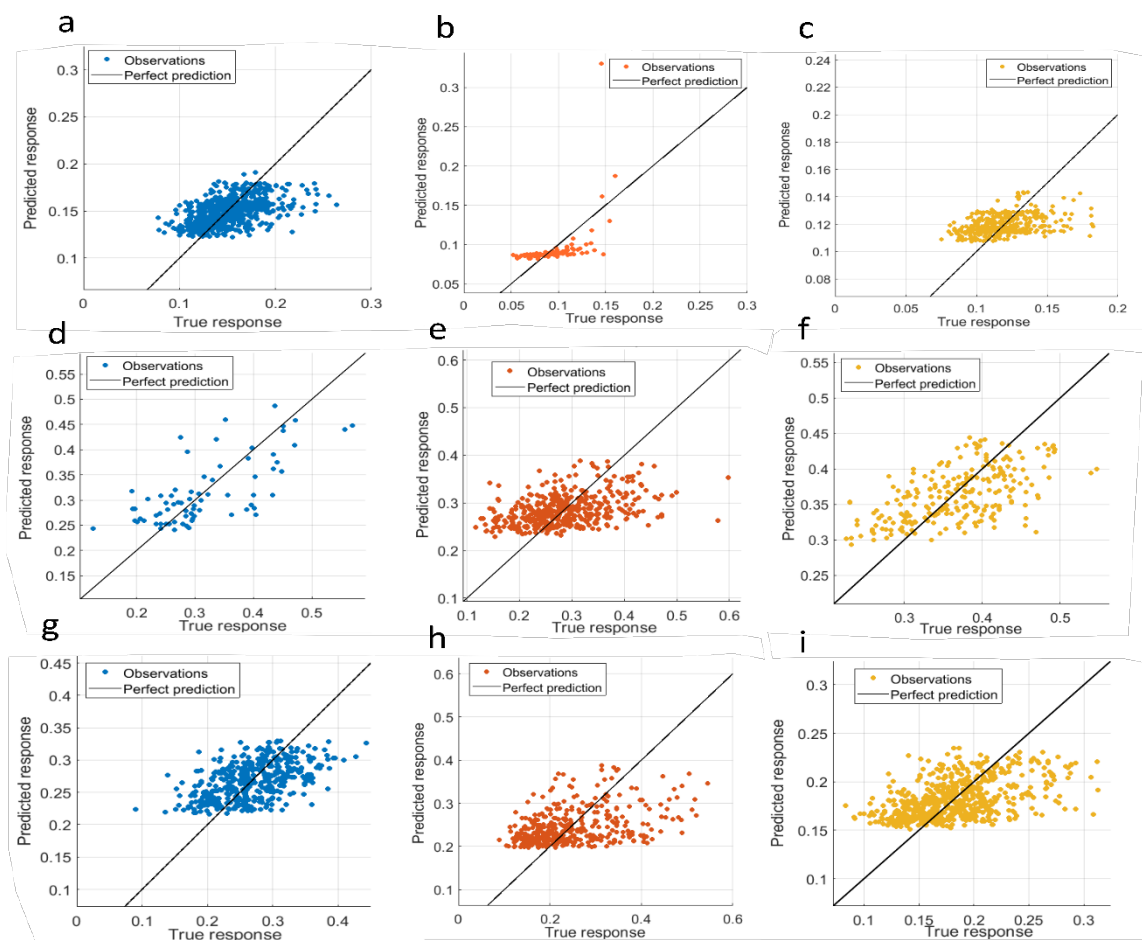

Figure S6 : Linear regression performed with  $\Delta I/I_0$  (response variable) and  $\Delta t$  (predictor) The results show here were obtained with pore 1 ( $d_t=3$  nm,  $d_b=200$  nm) under  $V=250$  mV a)  $A_{10}/T_{10}$  ( $R^2$  of  $X = 703$ ), b)  $A_{40}/T_{40}$  ( $R^2 = -0.12$ ;  $n = 116$ ), c)  $T_{40}$  ( $R^2 = 0.12$ ;  $n = 382$ ); pore 2 ( $d_t=4$  nm,  $d_b=350$  nm) under  $V=250$  mV d)  $A_{10}/T_{10}$  ( $R^2 = 0.50$ ;  $n = 80$ ), e)  $A_{40}/T_{40}$  ( $R^2 = 0.17$ ;  $n = 415$ ), f)  $T_{40}$  ( $R^2 = 0.33$ ;  $n = 253$ ) and pore 2 ( $d_t=4$  nm,  $d_b=350$  nm) under  $V=500$  mV g)  $A_{10}/T_{10}$  ( $R^2 = 0.27$ ;  $n = 421$ ), h)  $A_{40}/T_{40}$  ( $R^2 = 0.19$ ;  $n = 410$ ), i)  $T_{40}$  ( $R^2 = 0.23$ ;  $n = 590$ )

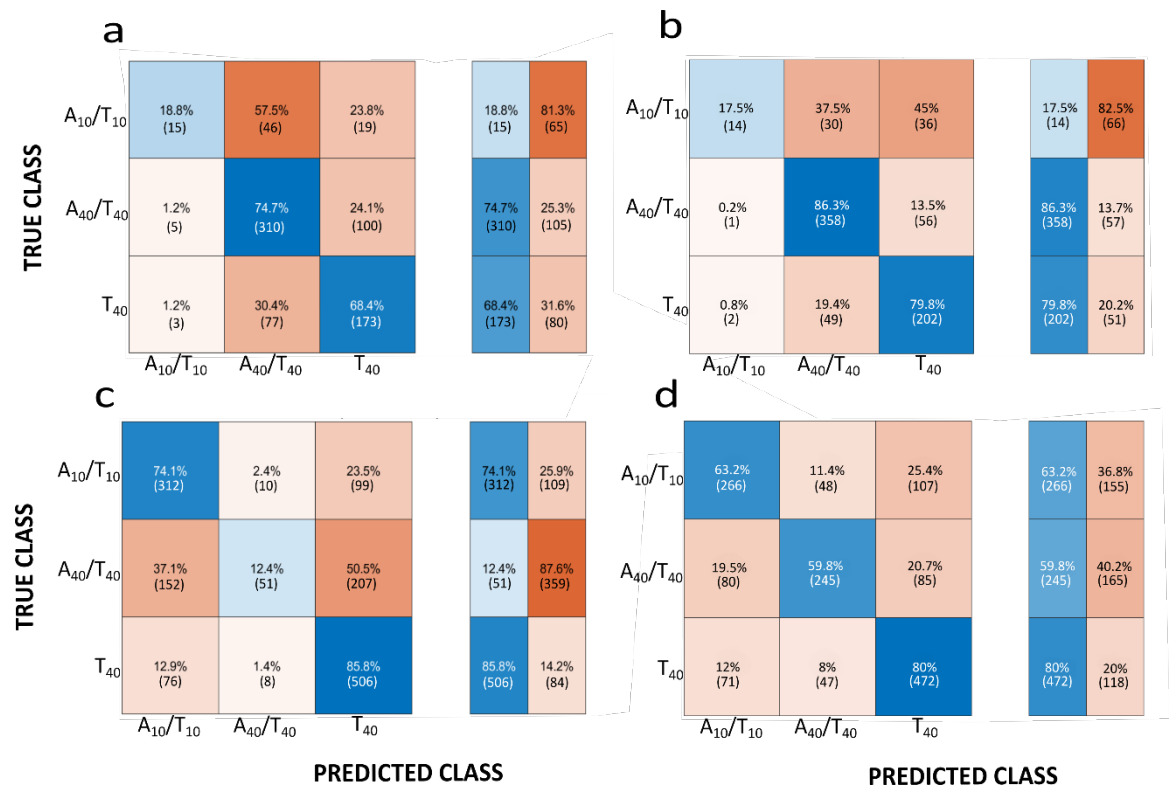

Figure S7 : Confusion matrix representing the accuracy of classification with the support vector machine approach obtained under V=250 mV using a) 2 features ( $\Delta I/I_0$ ,  $\Delta t$ ) and b) 5 features ( $\Delta I/I_0$ ,  $\Delta t$ , AUC, LS, RS) and under 500 mV using c) 2 features ( $\Delta I/I_0$ ,  $\Delta t$ ) and d) 5 features ( $\Delta I/I_0$ ,  $\Delta t$ , AUC, LS, RS). The results were obtained using the pore 2 ( $d_t=4$  nm,  $d_v=350$  nm)
